# Supplementary material for: Time-lapsed imaging of nanocomposite scaffolds reveals increased bone formation in dynamic compression bioreactors
Source: PubMed Central journal article supplement (PMC7835377; doi:10.1038/s42003-020-01635-4), 2021-01-25
Supplement: 42003_2020_1635_MOESM3_ESM.pdf [file 42003_2020_1635_MOESM3_ESM.pdf]

## **Description of Additional Supplementary Files**

**File:** Supplementary Data 1

**Description:** Source data underlying the graphs in the paper.
